# Supplementary material
Source: Elsevier journal article supplement (https://www.sciencedirect.com/science/article/pii/S0021755720301376)
Supplement: mmc1 [file S0021755720301376:mmc1.docx]

**JPED-2019-628_Supplementary Material**

**Appendix**

| **Basis/quantity of results** | **Strategy/link of the result** |
| --- | --- |
| MEDLINE *via* Ovid  **137** | (Cystic Fibrosis or Fibrosis, Cystic or Mucoviscidosis or Pulmonary Cystic Fibrosis or Cystic Fibrosis, Pulmonary or Pancreatic Cystic Fibrosis or Cystic Fibrosis, Pancreatic or Fibrocystic Disease of Pancreas or Pancreas Fibrocystic Disease or Pancreas Fibrocystic Diseases or Cystic Fibrosis of Pancreas).sh. AND (Constipation or Dyschezia or Colonic Inertia).sh. OR (Defecation or Defecations).sh. OR (Fecal Impaction or Impaction, Fecal or Feces, Impacted or Fecalith).sh. OR (Cystic Fibrosis or Fibrosis, Cystic or Mucoviscidosis or Pulmonary Cystic Fibrosis or Cystic Fibrosis, Pulmonary or Pancreatic Cystic Fibrosis or Cystic Fibrosis, Pancreatic or Fibrocystic Disease of Pancreas or Pancreas Fibrocystic Disease or Pancreas Fibrocystic Diseases or Cystic Fibrosis of Pancreas).af. OR (Constipation or Dyschezia or Colonic Inertia).af. OR (Defecation or Defecations).af. OR (Fecal Impaction or Impaction, Fecal or Feces, Impacted or Fecalith).af.  <http://ovidsp.txovid.ez88.periodicos.capes.gov.br/sp-3.31.1b/ovidweb.cgi?&S=ELOBFPPJMIDDPCIINCEKKCMCAIHDAA00&SELECT=S.sh%7c&R=13&Process+Action=display> |
| Embase  **286** | ('cystic fibrosis'/exp OR 'cystic fibrosis') AND [embase]/lim AND ('constipation'/exp OR 'constipation') AND [embase]/lim OR ('feces impaction'/exp OR 'feces impaction') OR [embase]/lim OR ('defecation'/exp OR 'defecation') AND [embase]/lim |
| Bireme (LILACS)  **6** | ((tw:("Cystic Fibrosis" OR "Fibrose Cistica"))) AND ((((tw:(Defecation OR Defecação))) OR ((tw:("Fecal Impaction" OR "Impacção Fecal"))) OR ((tw:(Constipation OR "Constipação Intestinal")))) AND db:("LILACS" OR "IBECS" OR "BINACIS" OR "BDENF" OR "HomeoIndex" OR "CUMED" OR "DECS" OR "MedCarib" OR "colecionaSUS" OR "BBO"))  http://pesquisa.bvsalud.org/portal/?q=((tw%3A(%22Cystic%20Fibrosis%22%20OR%20%22Fibrose%20Cistica%22)))%20AND%20((((tw%3A(Defecation%20OR%20Defeca%C3%A7%C3%A3o)))%20OR%20((tw%3A(%22Fecal%20Impaction%22%20OR%20%22Impac%C3%A7%C3%A3o%20Fecal%22)))%20OR%20((tw%3A(Constipation%20OR%20%22Constipa%C3%A7%C3%A3o%20Intestinal%22))))%20AND%20db%3A(%22LILACS%22%20OR%20%22IBECS%22%20OR%20%22BINACIS%22%20OR%20%22BDENF%22%20OR%20%22HomeoIndex%22%20OR%20%22CUMED%22%20OR%20%22DECS%22%20OR%20%22MedCarib%22%20OR%20%22colecionaSUS%22%20OR%20%22BBO%22)) |
| Scopus  **413** | ( TITLE-ABS-KEY ( "Cystic Fibrosis" ) ) AND ( ( TITLE-ABS-KEY ( "Defecation" ) ) OR ( TITLE-ABS-KEY ( "Fecal Impaction" ) ) OR ( TITLE-ABS-KEY ( constipation ) ) )  https://www.scopus.com/results/results.uri?origin=searchhistory&sort=plf-f&src=s&mltEid=&mltAll=t&sid=e859e72b3b8931362f842f185d356161&sot=comb&sdt=comb&sl=141&s=%28TITLE-ABS-KEY%28%22Cystic+Fibrosis%22%29%29+AND+%28%28TITLE-ABS-KEY%28%22Defecation%22%29%29+OR+%28TITLE-ABS-KEY%28%22Fecal+Impaction%22%29%29+OR+%28TITLE-ABS-KEY%28Constipation%29%29%29&txGid=b538823d19ceb7b1d14587ab34d4d039 |
| Web of Science  **141** | TS=(Cystic Fibrosis) OR TI=(Cystic Fibrosis) AND TS=(Constipation) OR TI=(Constipation) OR TS=(Defecation) OR TI=(Defecation) OR TS=("Fecal Impaction") OR TI=("Fecal Impaction") |
| Cochrane  **31** | "Cystic Fibrosis" AND Constipation OR Defecation OR "Fecal Impaction" |
| CINHAL  **10** | "Cystic Fibrosis" AND (Constipation OR Defecation OR "Fecal Impaction") |
| Health Systems Evidence  **0** | "Cystic Fibrosis" AND Constipation OR Defecation OR "Fecal Impaction" |
| PQD Evidence  **0** | "Cystic Fibrosis" AND Constipation OR Defecation OR "Fecal Impaction" |
| CRD Canadian Agency for Drugs and Technologies in Health  0 | "Cystic Fibrosis" AND Constipation OR Defecation OR "Fecal Impaction" |
| INATHA – International Network of Agencies for Health Technology Assessment  0 | "Cystic Fibrosis" AND Constipation OR Defecation OR "Fecal Impaction" |
| CADTH – Canadian Agency for Drugs and Technologies in Health  1 | "Cystic Fibrosis" AND Constipation OR Defecation OR "Fecal Impaction" |
| Clinical Trials – US NIH – A service of the U.S. National Institutes of Health  10 | Constipation OR Defecation OR "Fecal Impaction" | "Cystic Fibrosis" |
| PEDro  0 | "Cystic Fibrosis" AND Constipation OR Defecation OR "Fecal Impaction" |
